# Supplementary figures and images for: Evaluating the Efficacy of Type 2 Diabetes Polygenic Risk Scores in an Independent European Population
Source: MDPI journal article supplement (doi:10.3390/ijms25021151), 2024-01-17

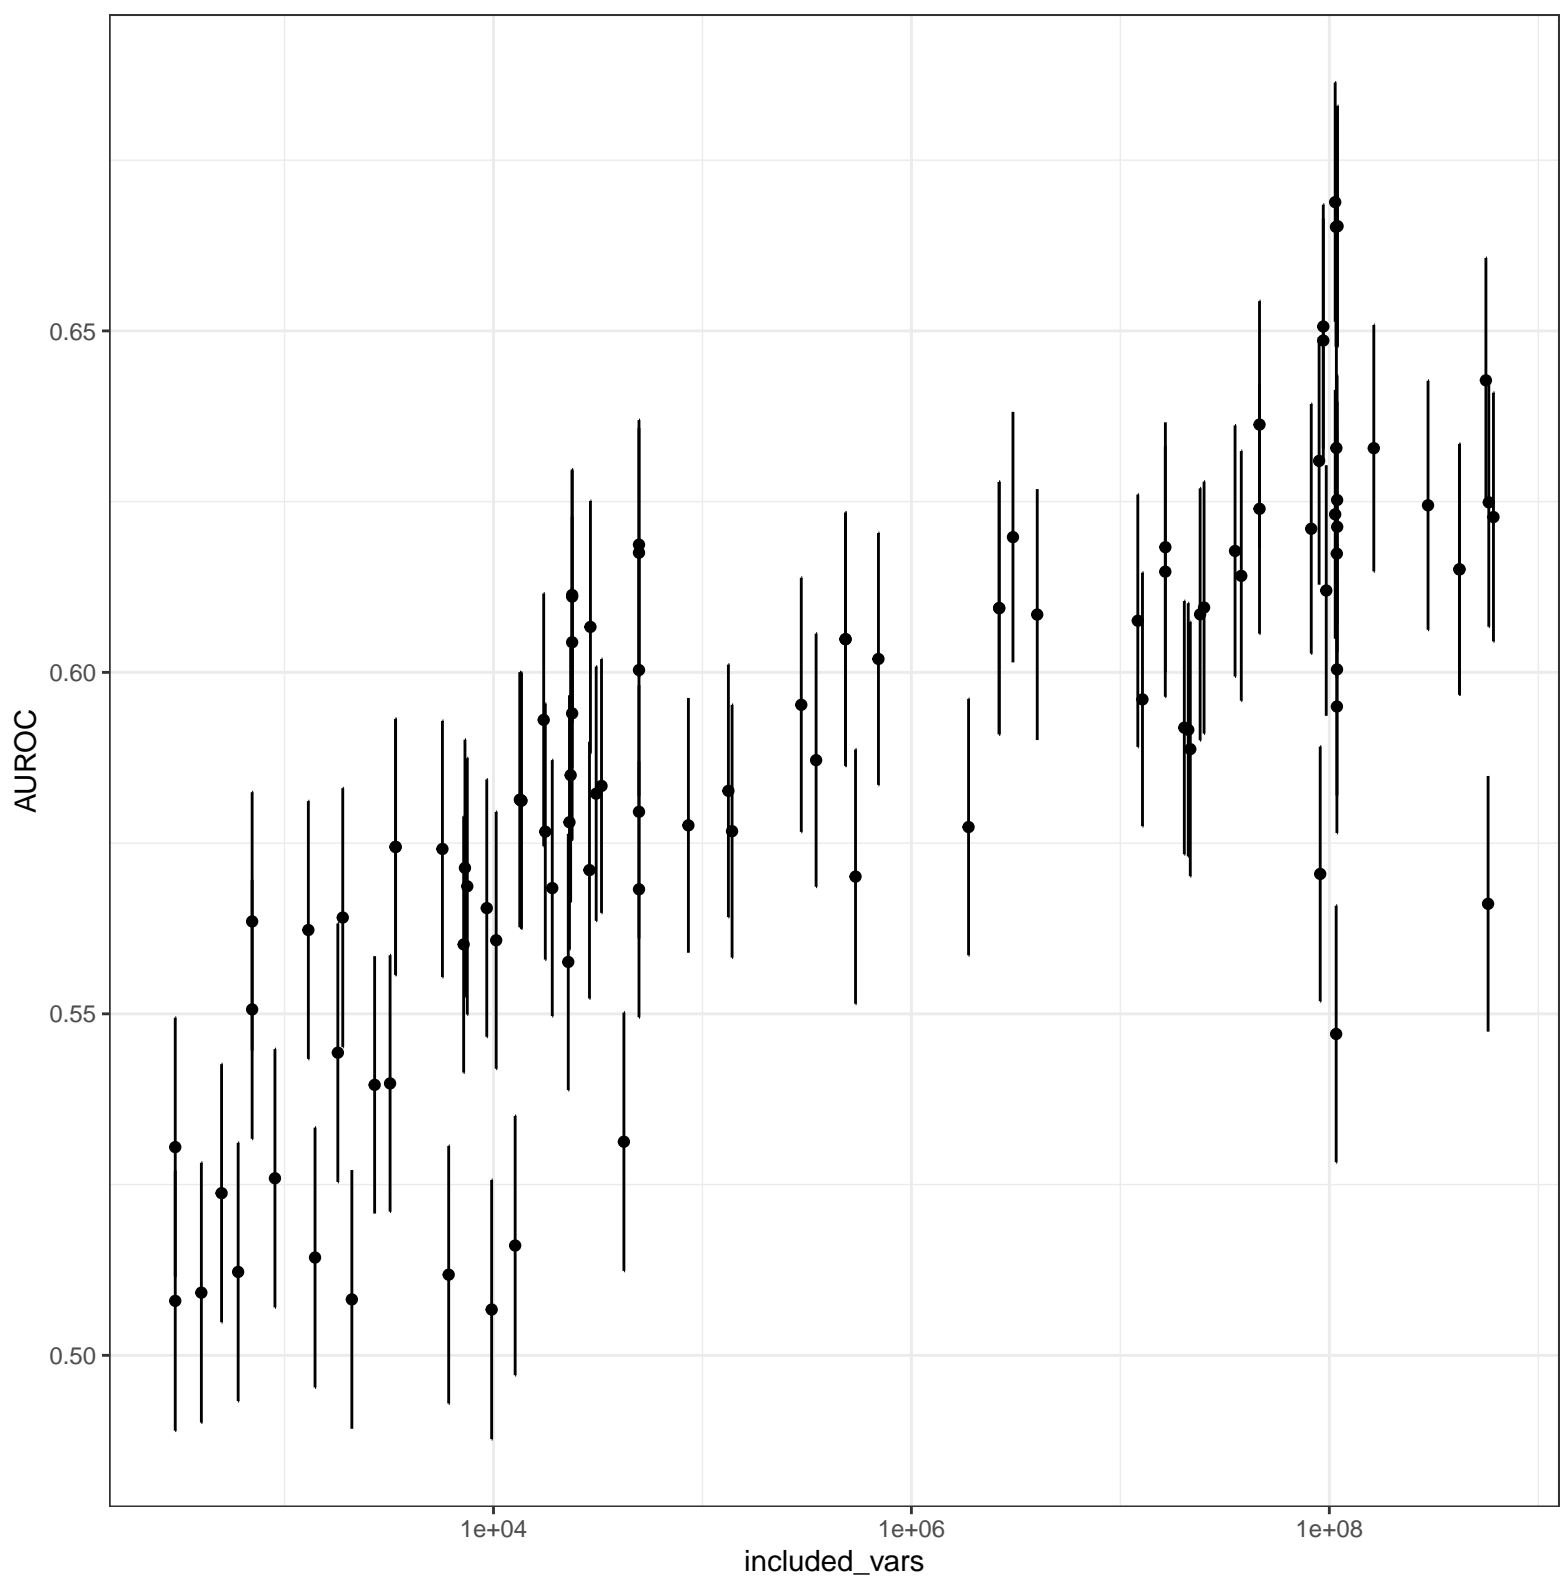

Supplement: s1 [file s1]

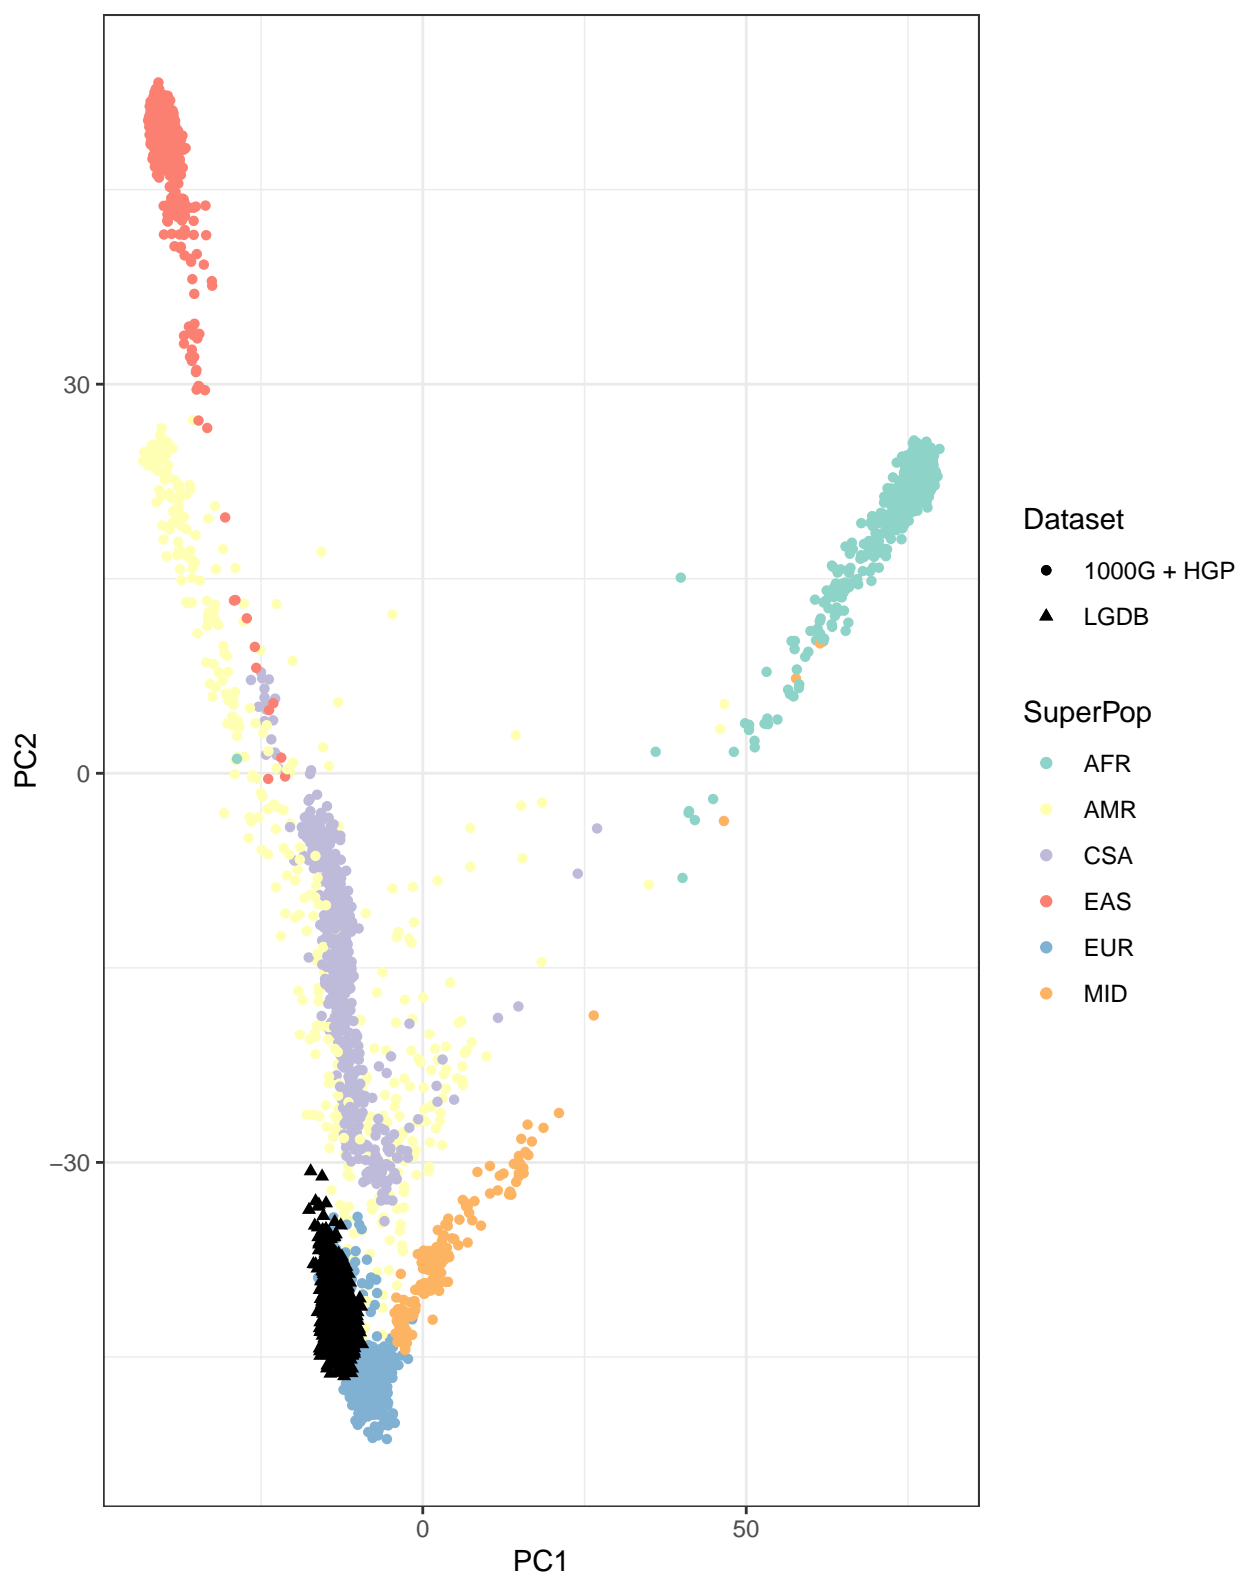

Supplement: s1 [file s1]

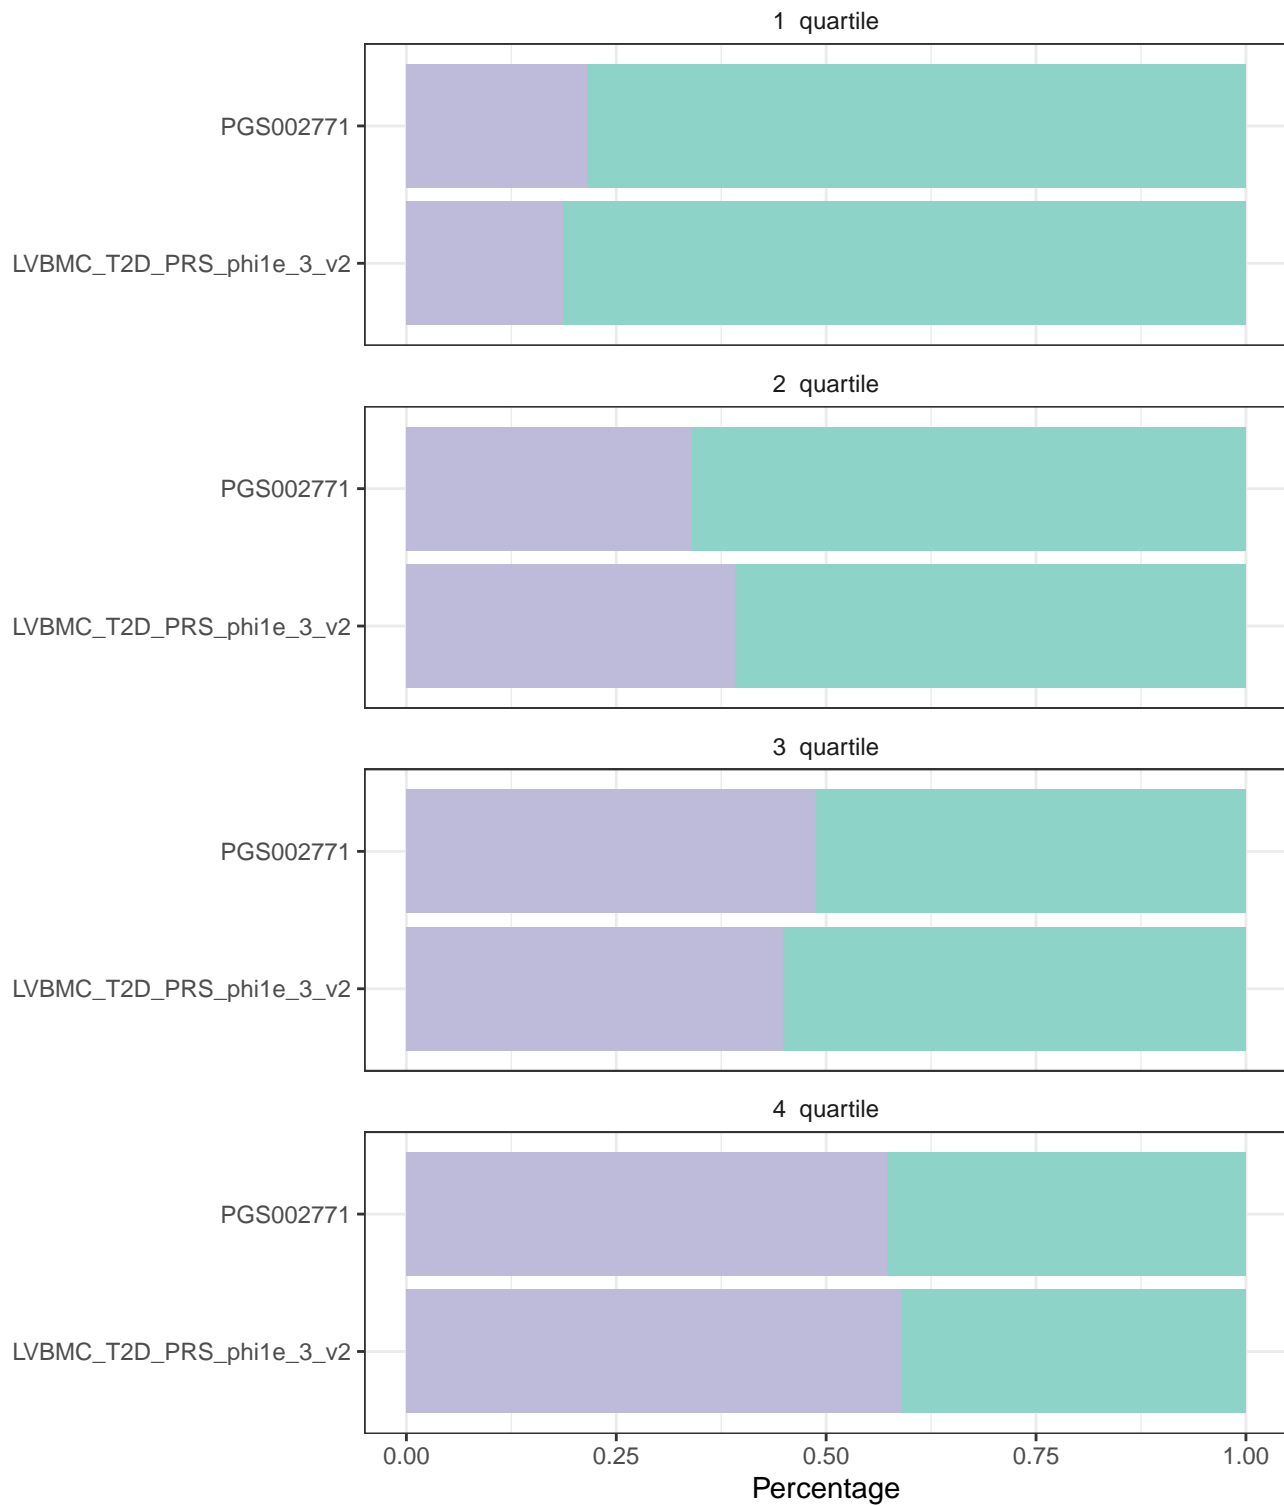

Supplement: s1 [file s1]

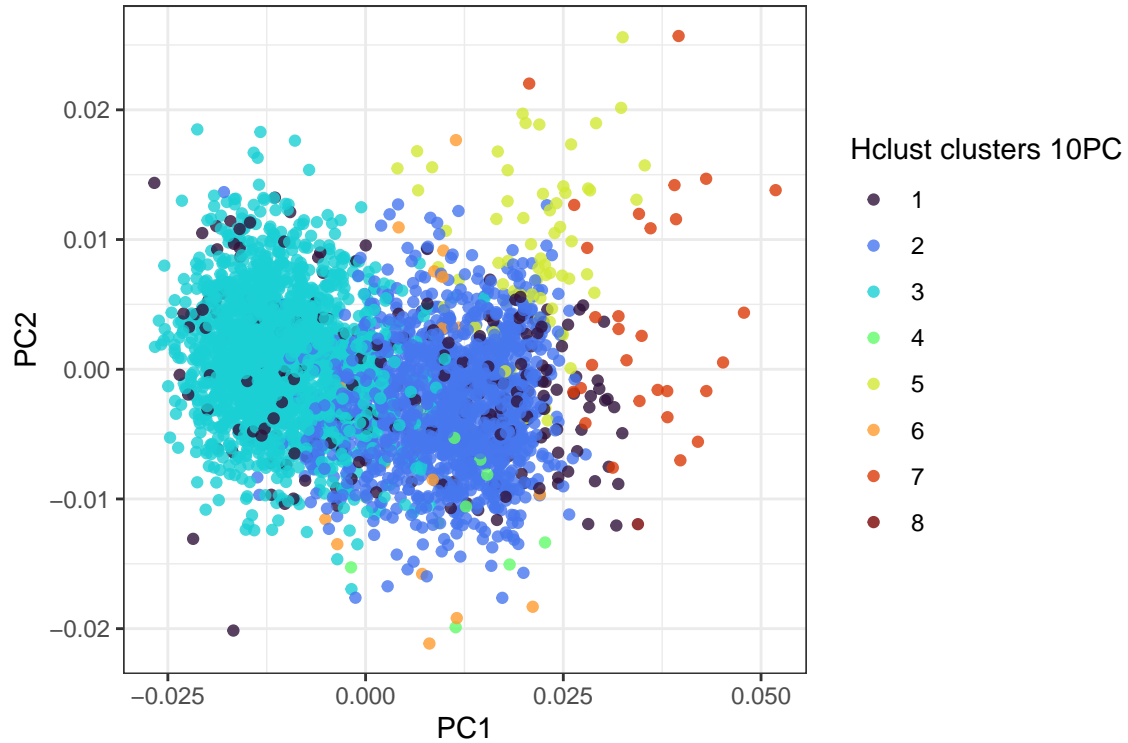

Supplement: s1 [file s1]
